# Supplementary material
Source: Springer Nature journal article supplement (https://www.springermedizin.de/resource/supplementary/13058_2010_9505_MOESM15_ESM.pdf/9702284)

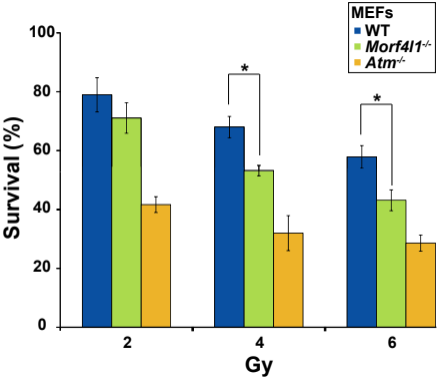

Supplement: MOESM15 [file 9702284]
